# Supplementary material for: Fine-scale structural variation of the human genome
Source: Springer Nature journal article supplement (doi:10.1038/ng1562), 2005-05-15
Supplement: ng1562-S16.pdf [file ng1562-S16.pdf]

Supplementary Figure 16

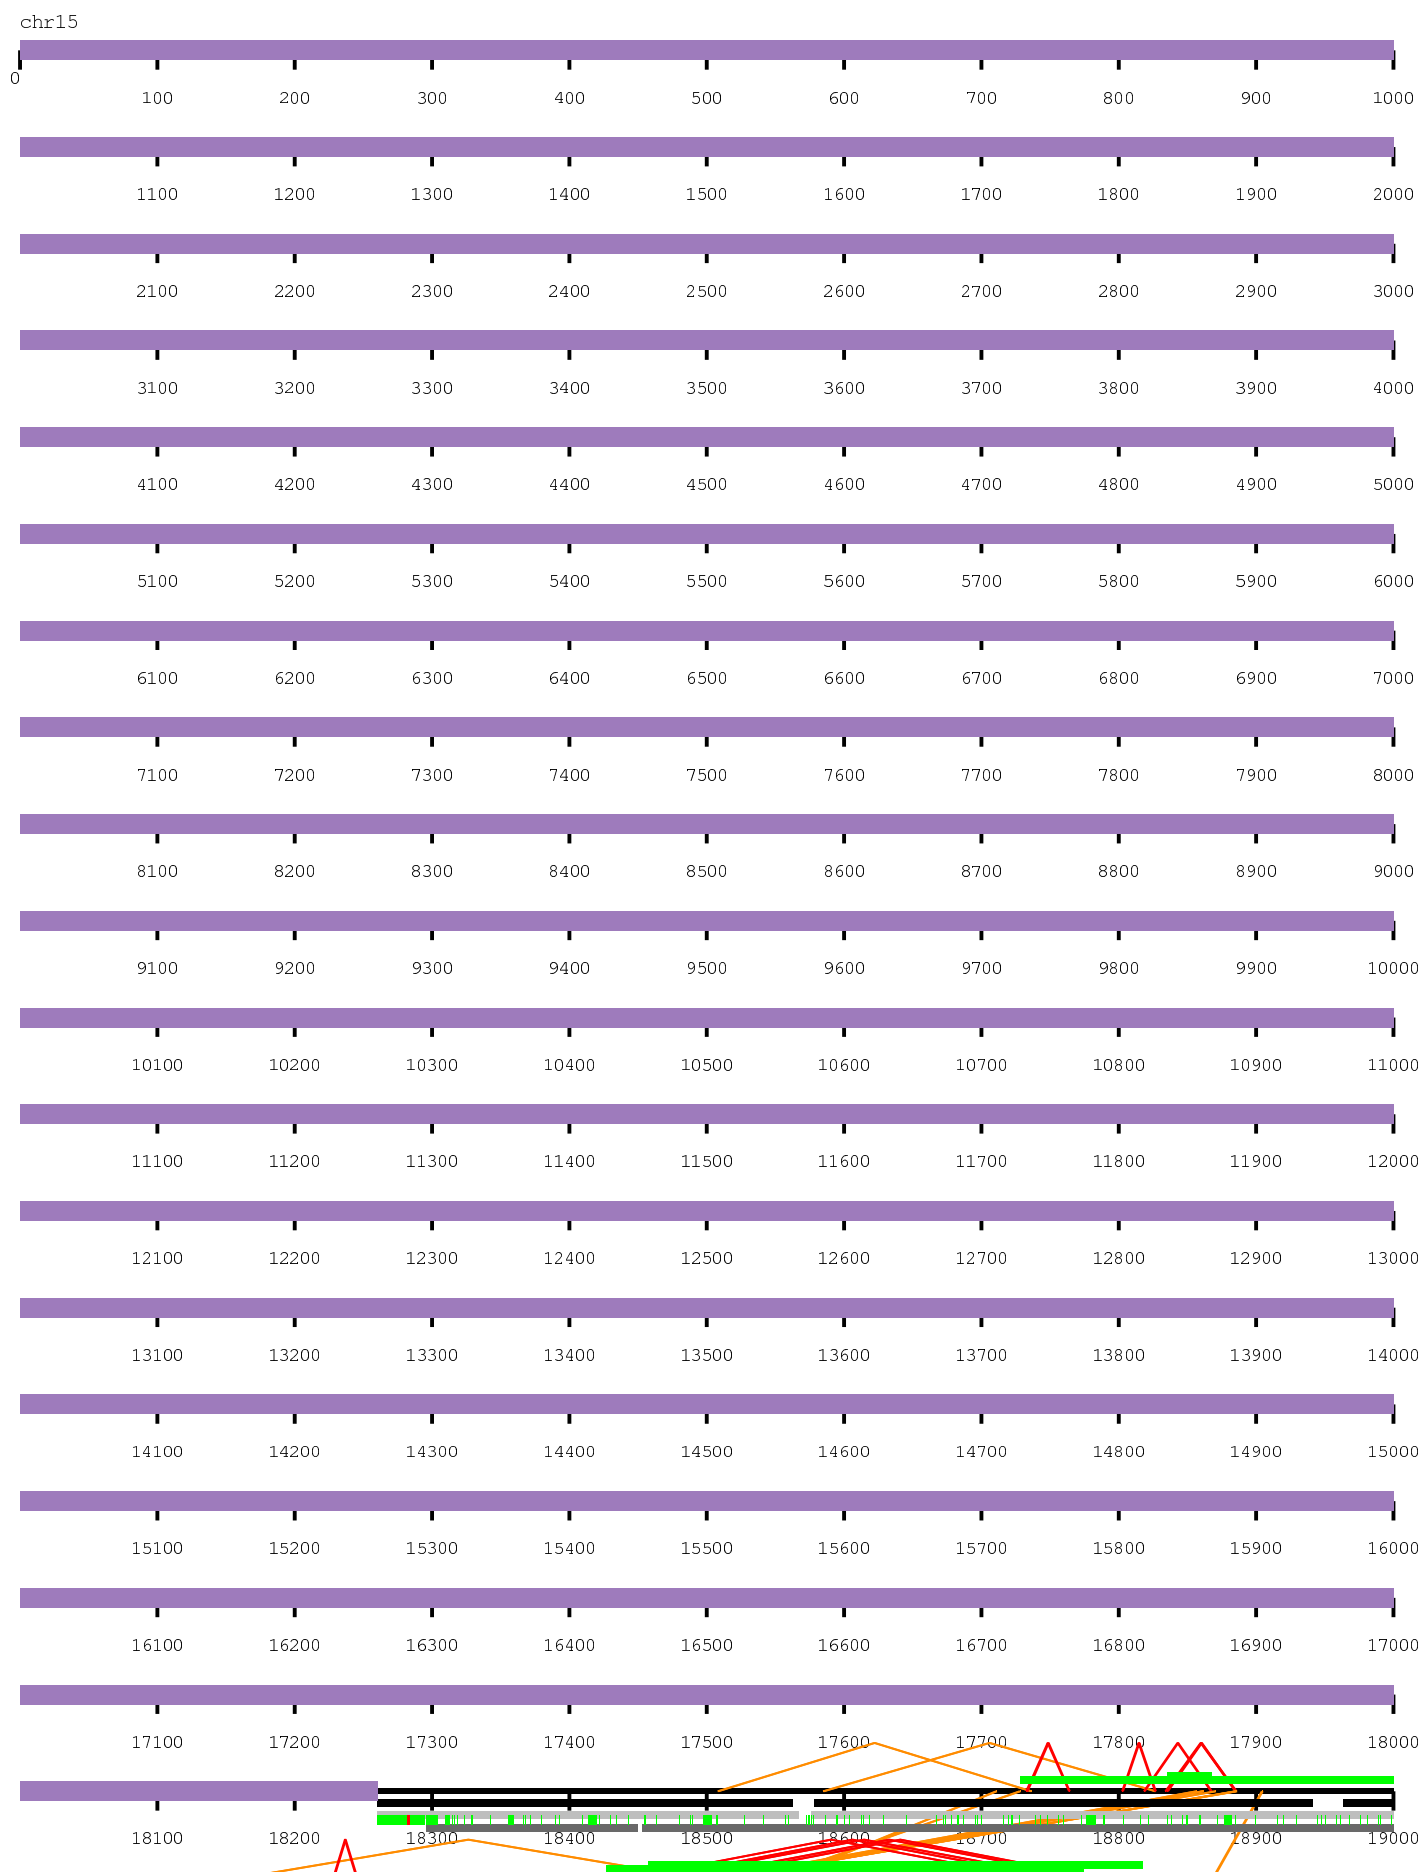

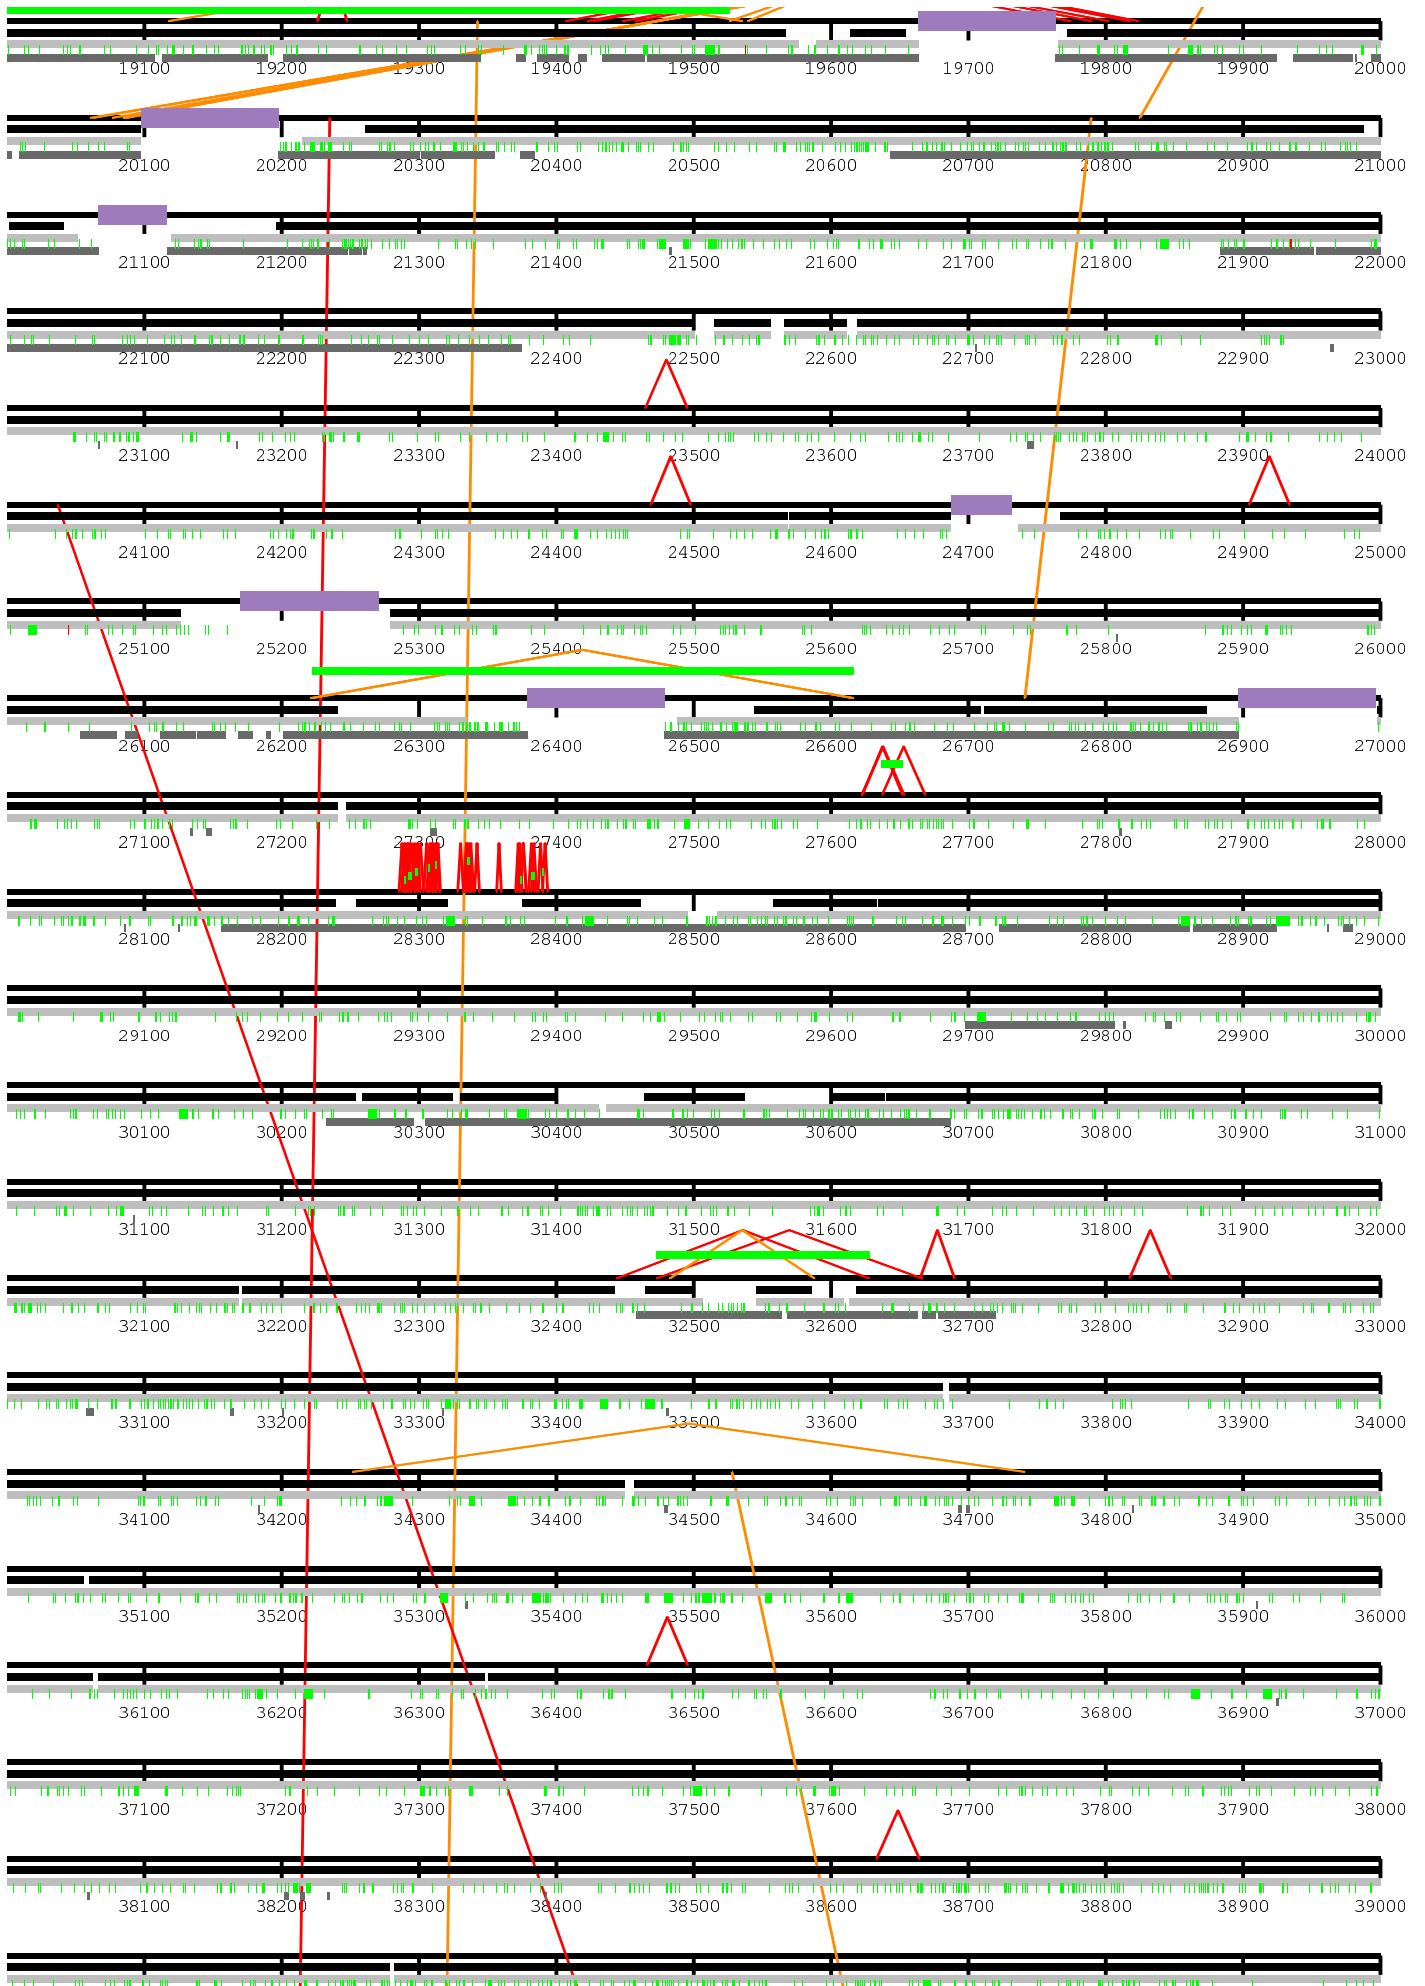

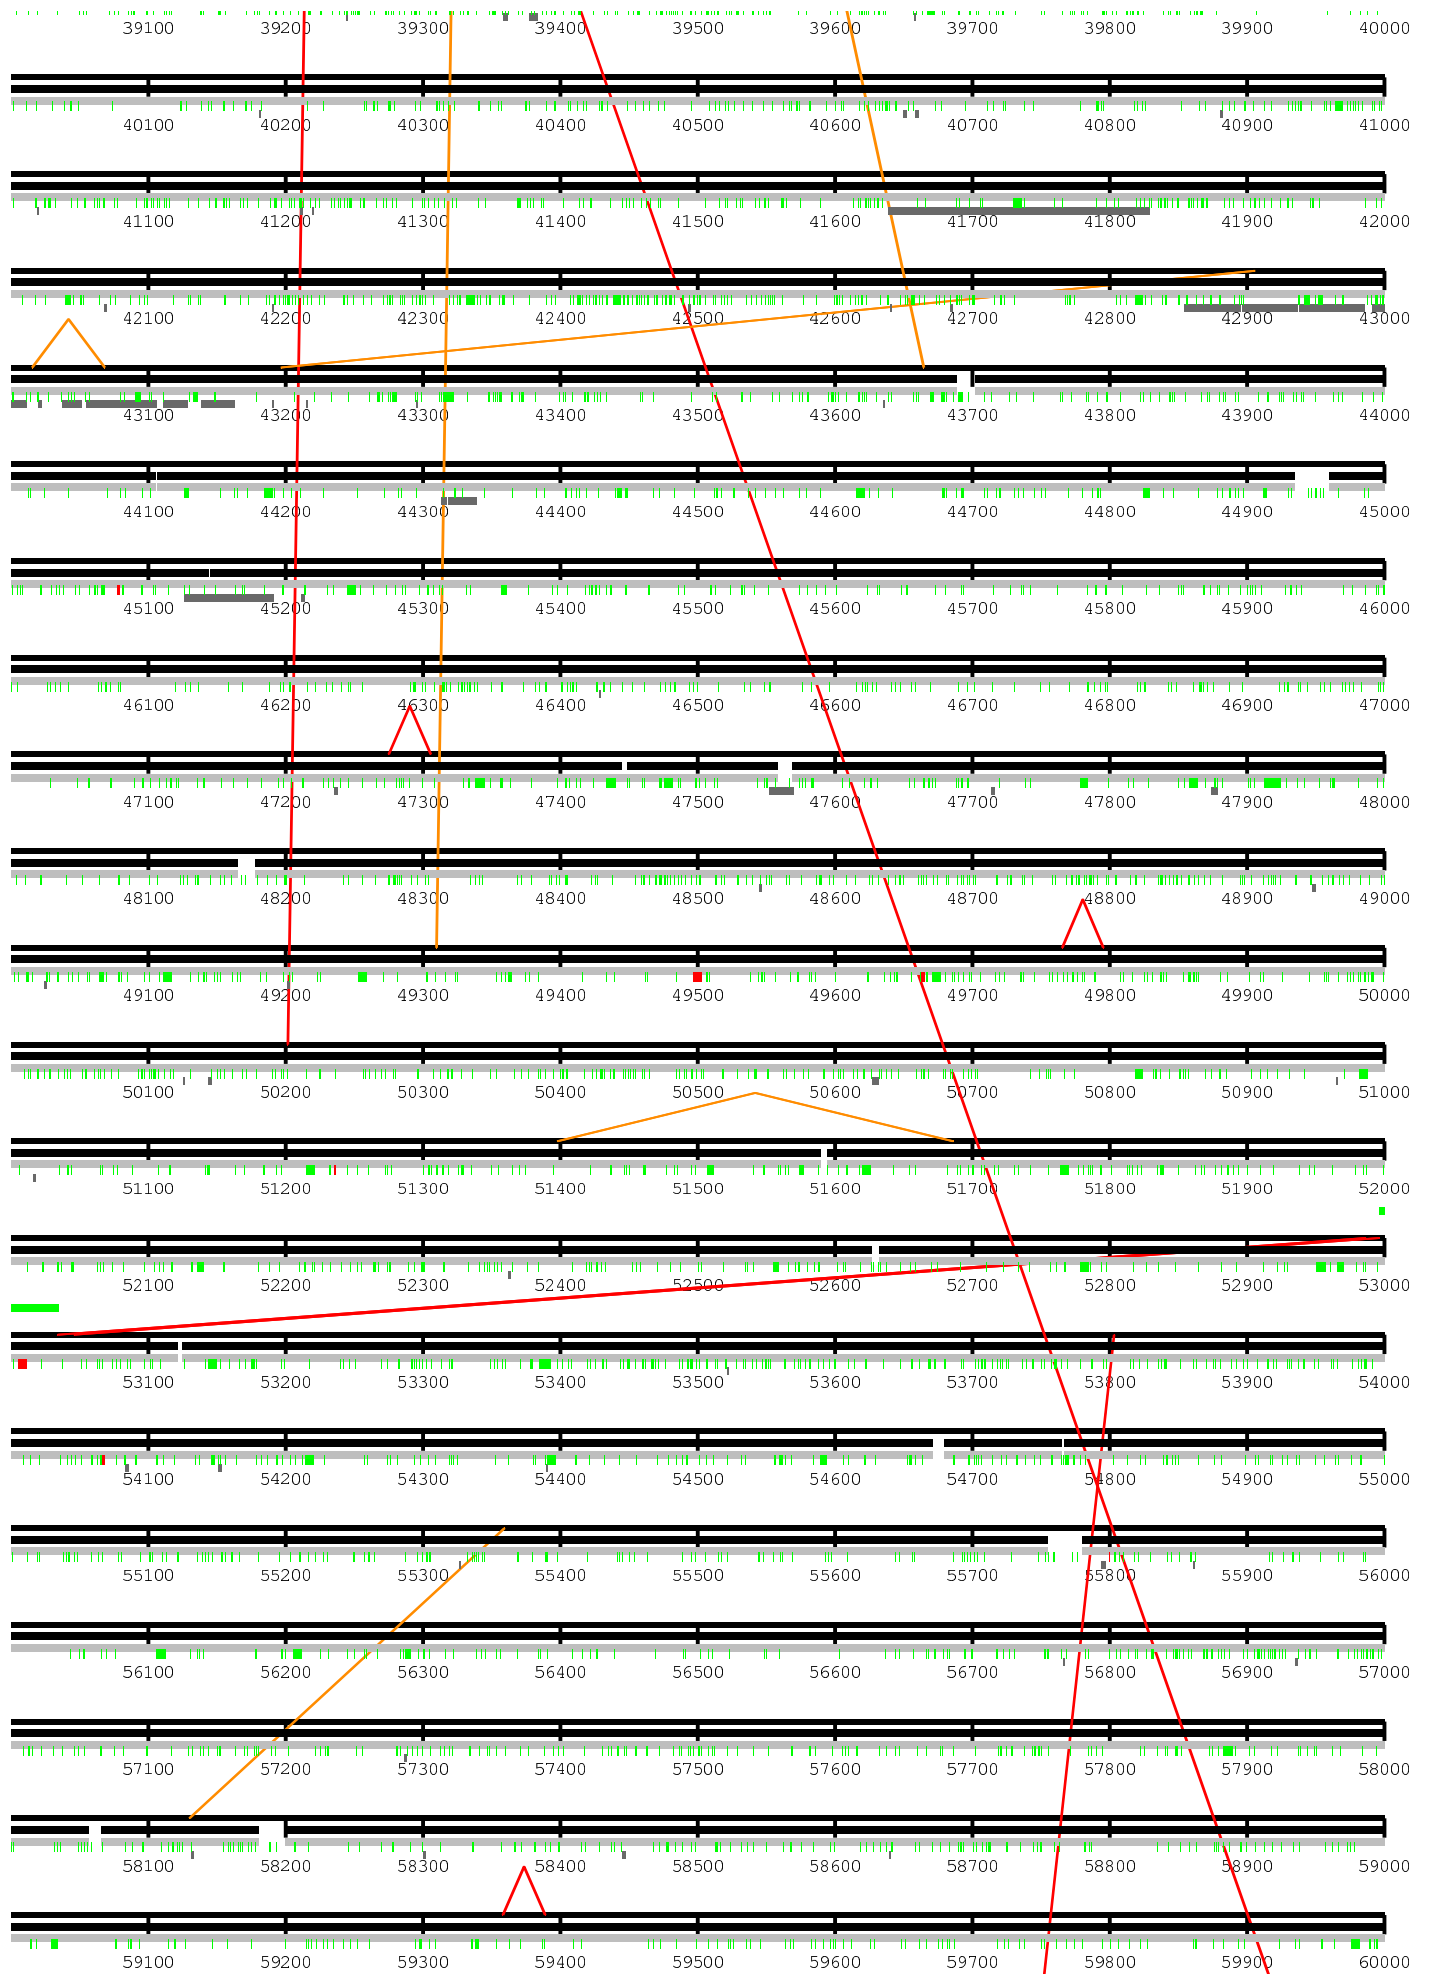

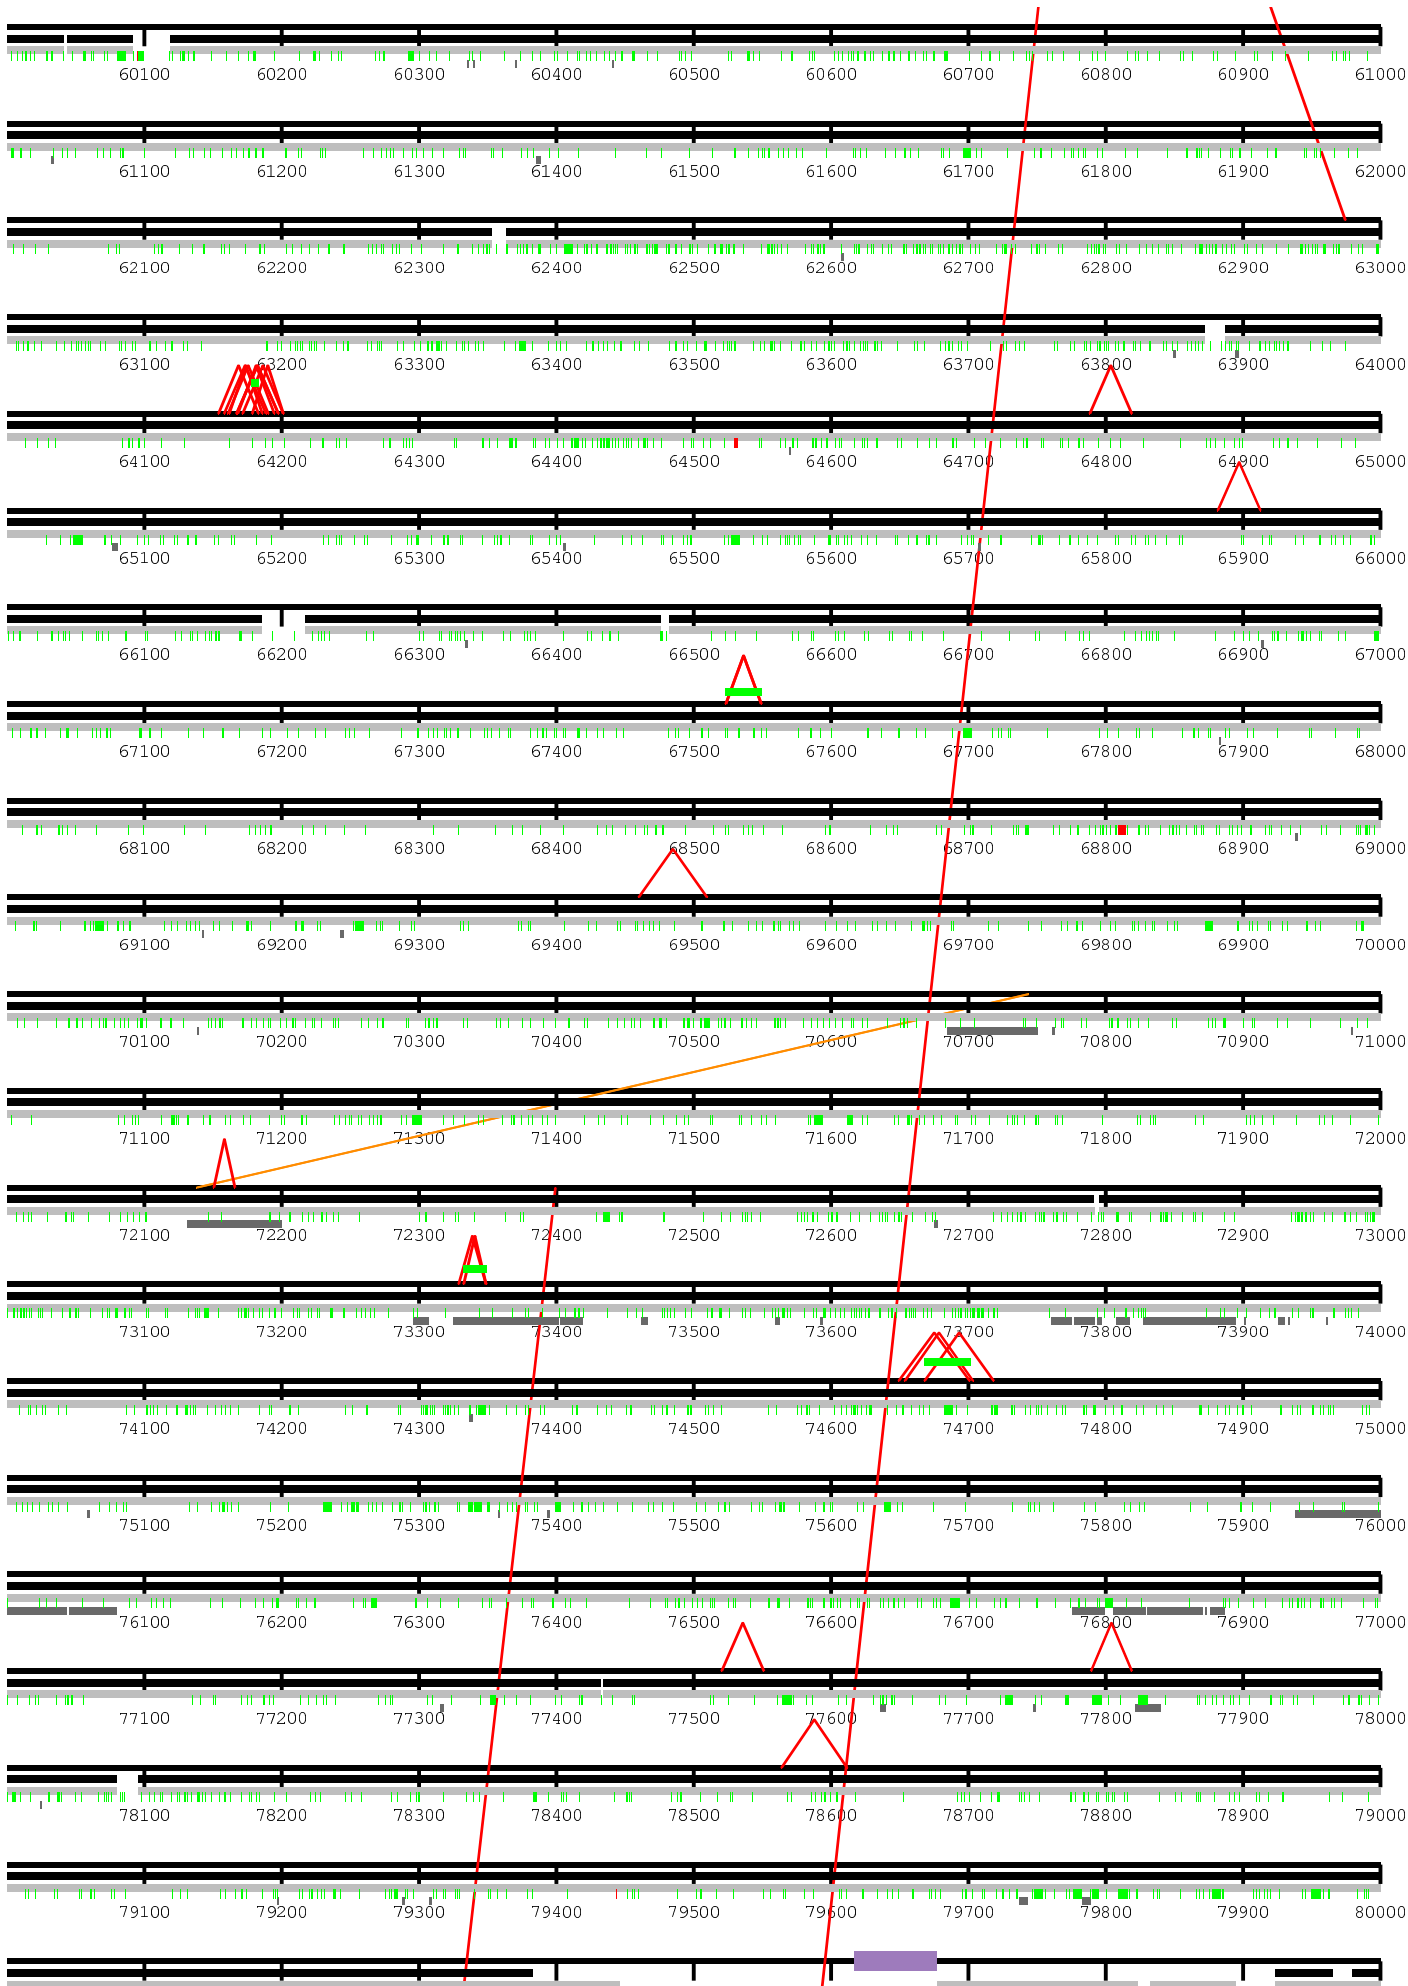

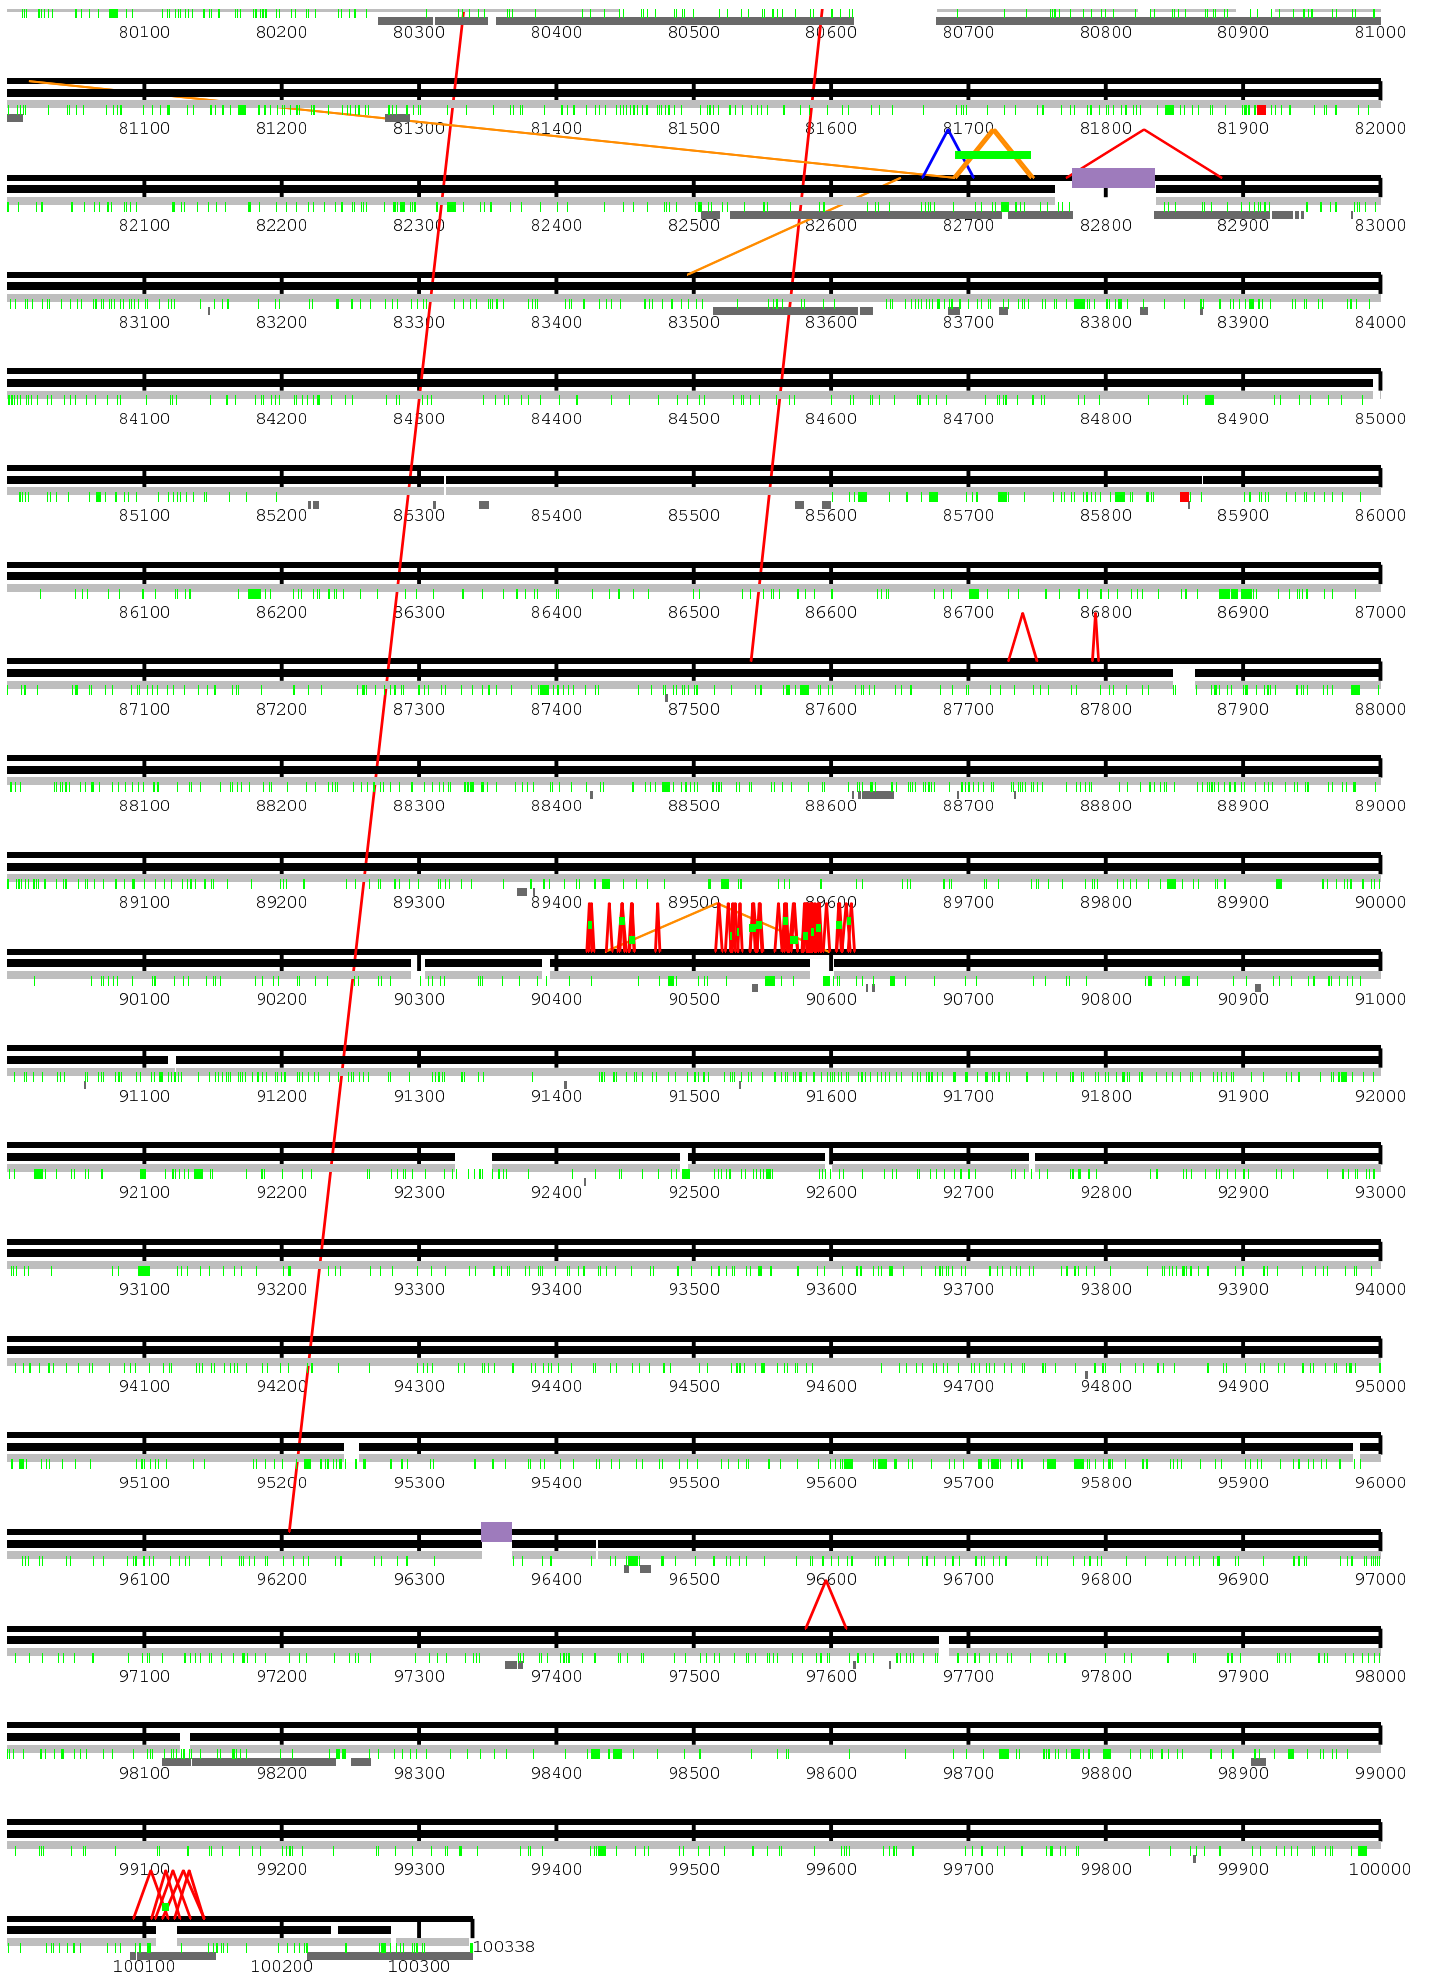

**Supplementary Figure 2-25.** Chromosomal Views of Structural Variation. A graphic representation of clusters of discordant fosmids is shown for each human chromosome (build 35, May 2004 assembly). Coordinates are indicated in kb. See Figure 1b for color schema. Concordant fosmids are removed and represented as a black bar and a gray bar beneath the line for best and tied placements respectively (See Methods). The Y chromosome is shown but, as expected, no paired-ends were mapped because the fosmid DNA source was female.
